# Supplementary material for: Single domain antibody-antigen adducts that target Class II MHC induce antigen-specific tolerance
Source: Research Square preprint supplement (doi:10.21203/rs.3.rs-192181/v1), 2021-02-11
Supplement: Supplementary file 2 [file d02d004963a129ee22db63c7.pdf]

Supplementary Figure 1

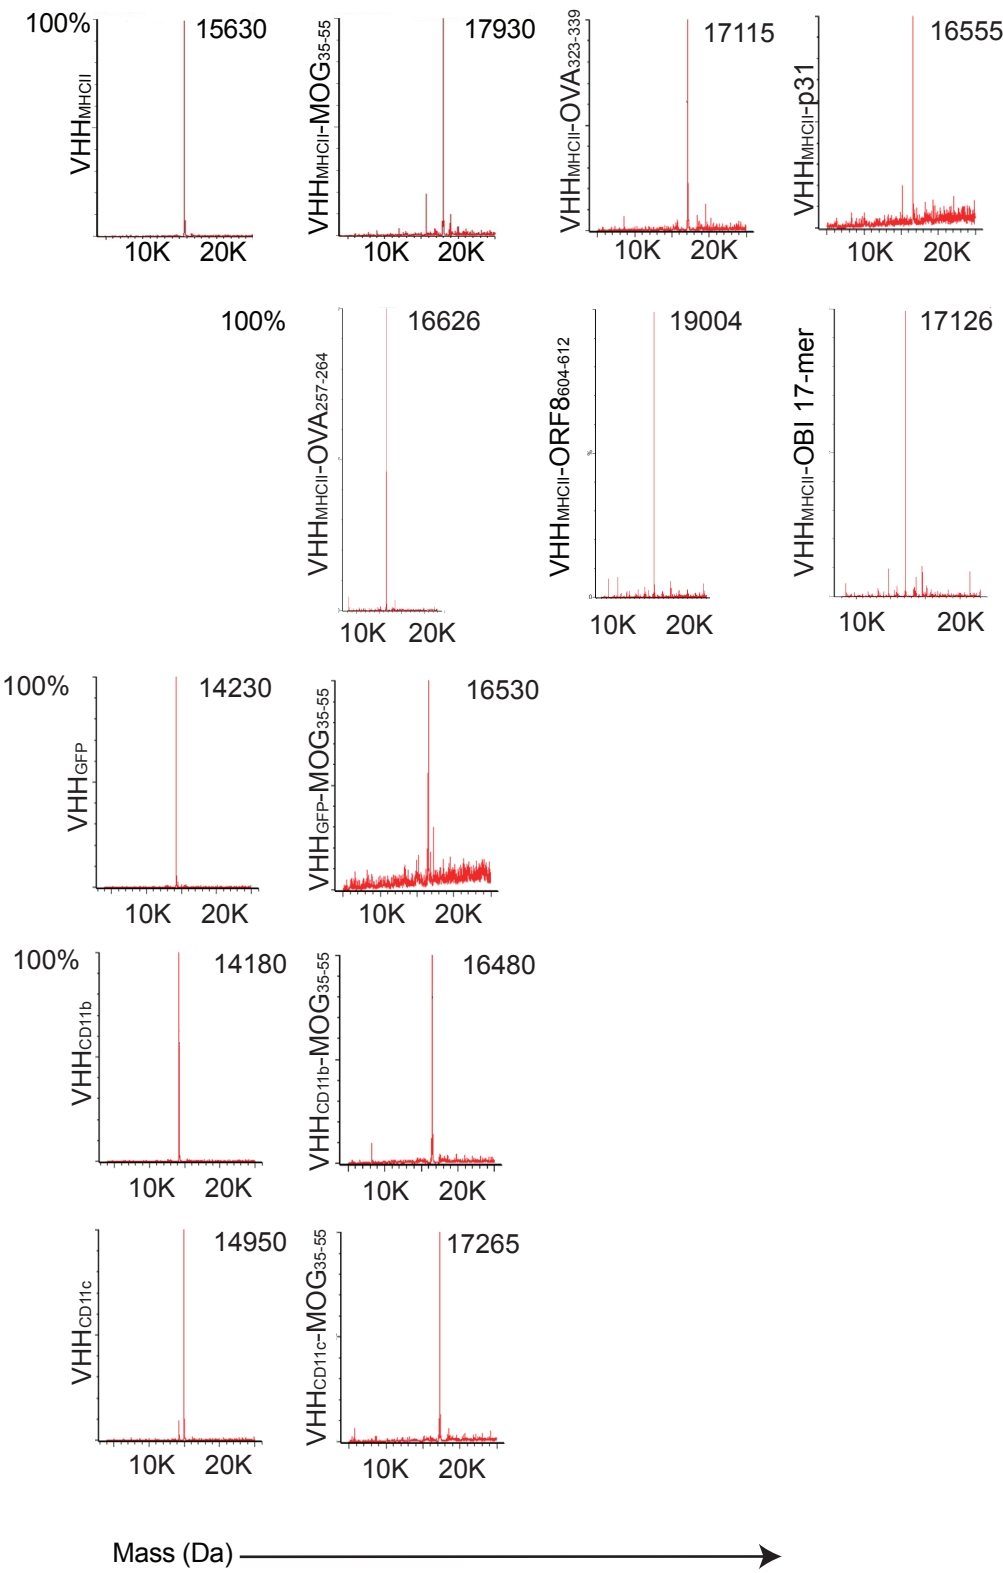

LC-MS of purified VHH<sub>MHClI</sub> and VHH<sub>MHClI</sub>-antigens.

# Supplementary Figure 2

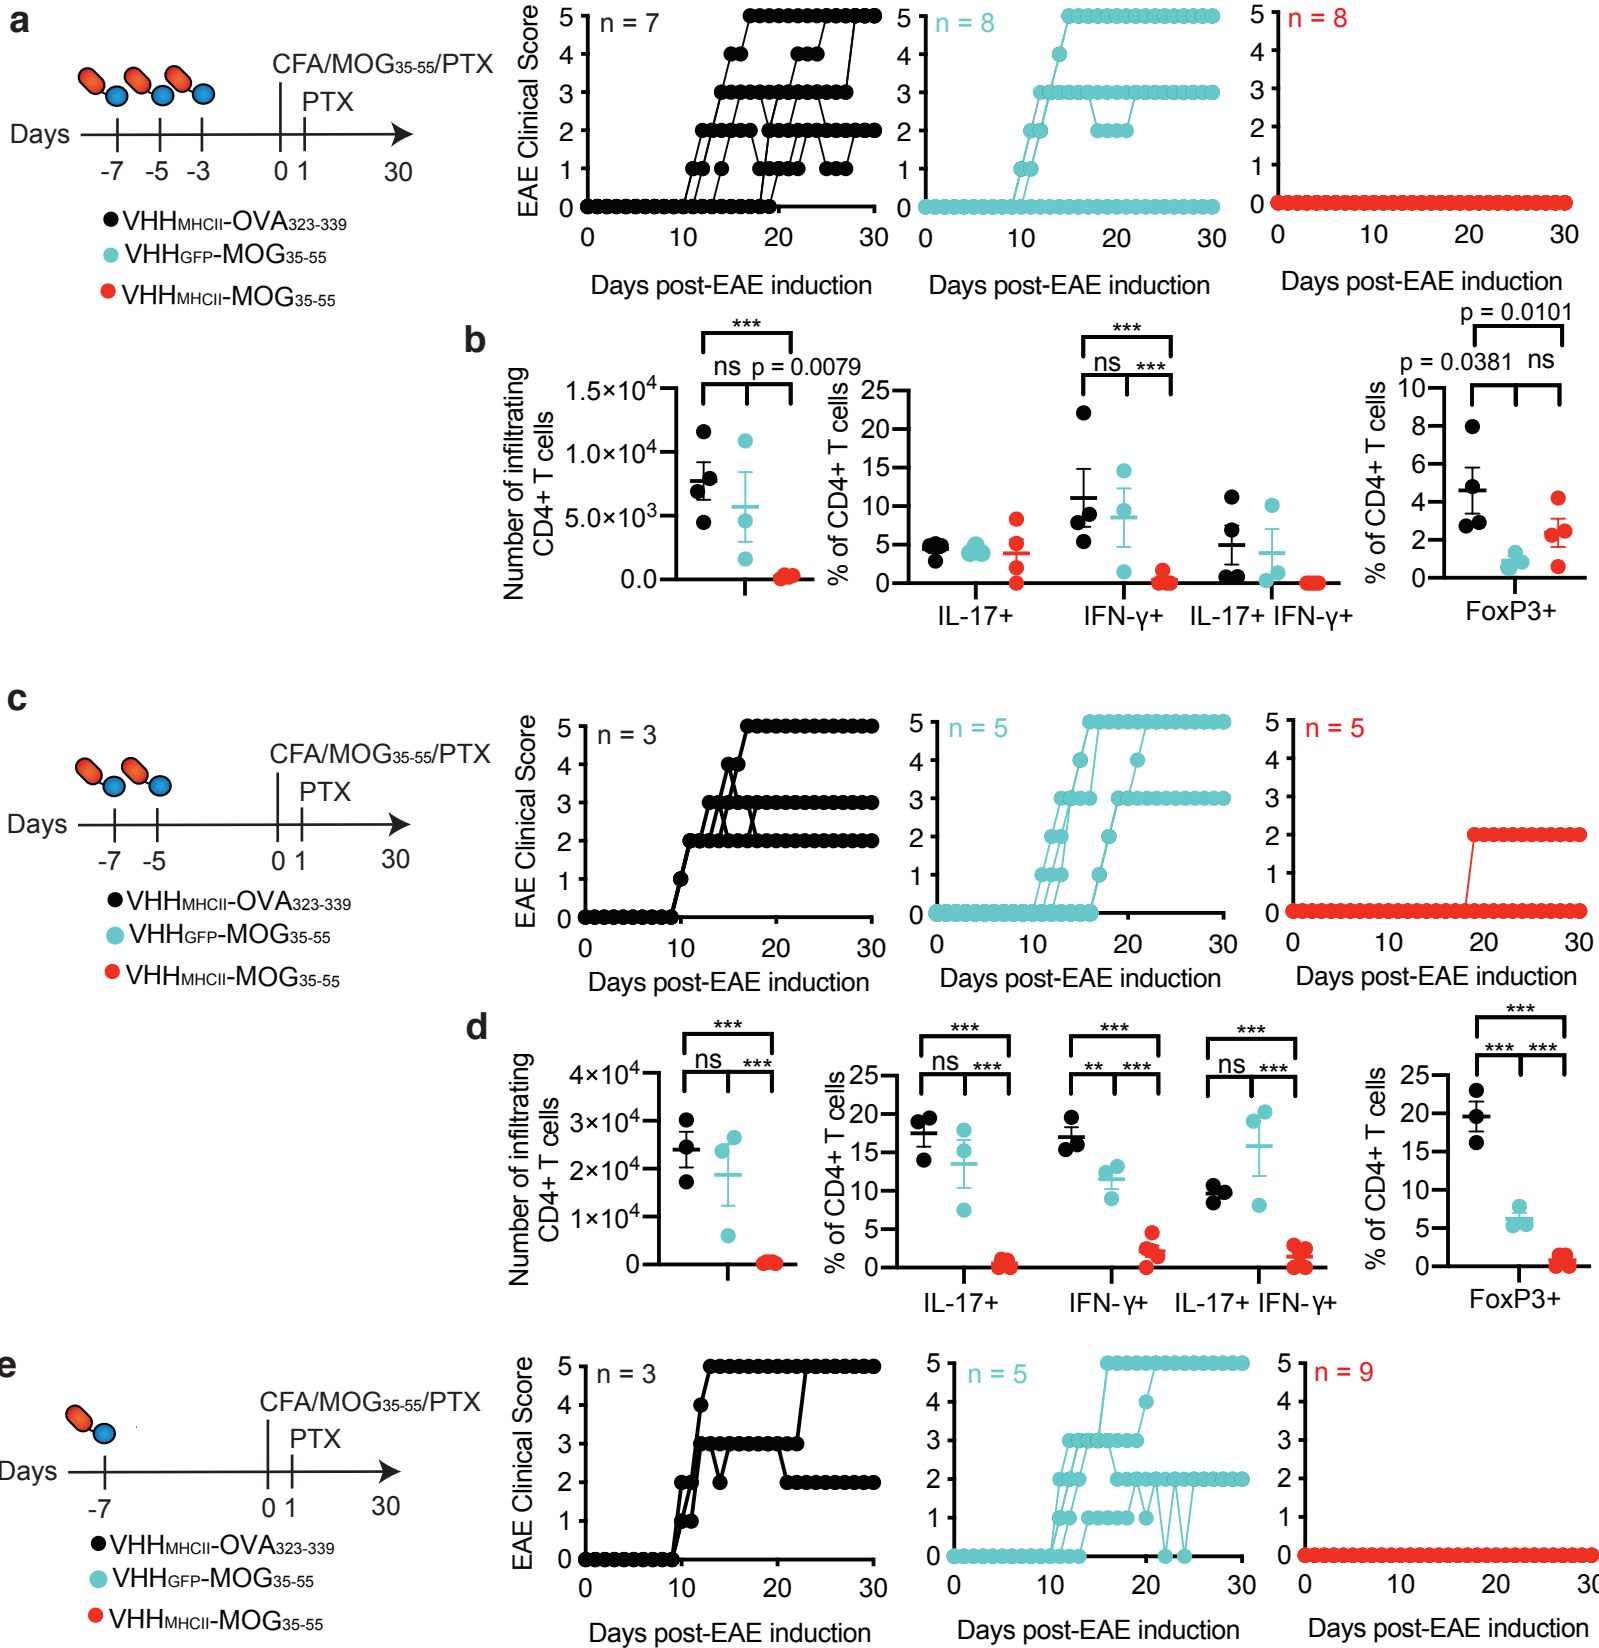

Individual clinical score of each that received VHH-peptide prophylactic treatment at (a) 3, (b) 2, and (c) 1 dose(s) as indicated. Clinical scores: 1, limp tail; 2, partial hind leg paralysis; 3, complete hind leg paralysis; 4, complete hind and partial front leg paralysis; and 5, moribund. Flow cytometry analyses of Th1 and Th17 infiltrating CD4+ lymphocytes in the spinal cord at the end point for mice that received 3 (b) and 2 (d) doses of VHH-antigen. Frequency of FoxP3+ CD4+ regulatory T cells are also indicated. Data shown as mean +/- SEM of biological replicates. n.s. not significant; \*\*\*p<0.001, unpaired t test with Holm-Sidak adjustment.

# Supplementary Figure 3

a

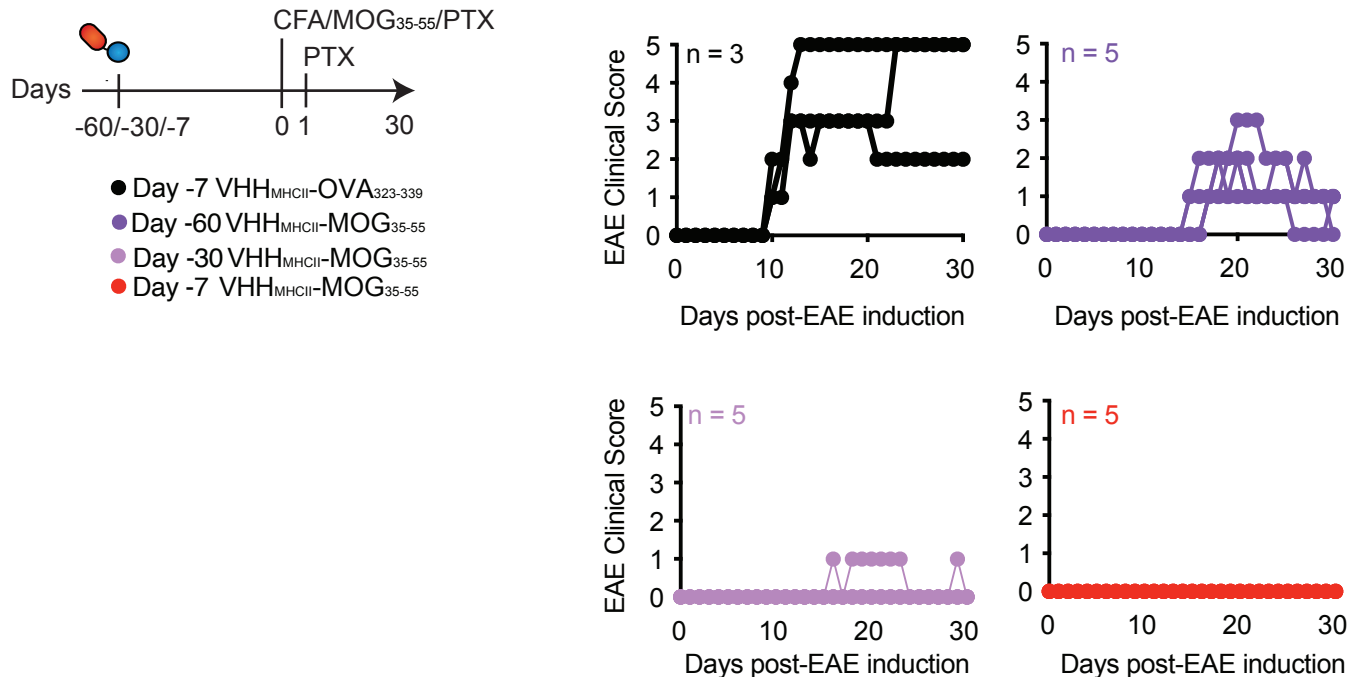

b

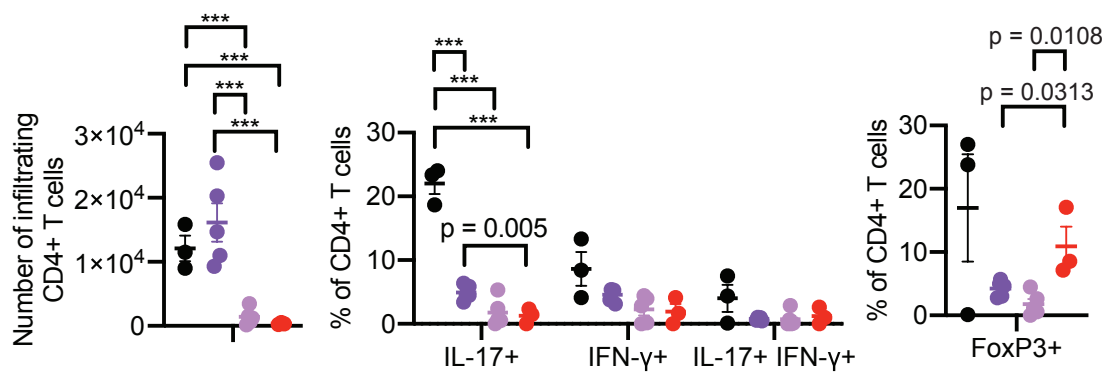

**a**, Individual clinical score of each that received VHH-peptide prophylactic treatment at -60, -30, and -7 days prior to EAE induction. Clinical scores: 1, limp tail; 2, partial hind leg paralysis; 3, complete hind leg paralysis; 4, complete hind and partial front leg paralysis; and 5, moribund. **b**, Flow cytometry analyses of Th1 and Th17 infiltrating CD4+ lymphocytes in the spinal cord at the end point for mice that received 1 dose of VHH-antigen at the indicated time points. Frequency of FoxP3+ CD4+ regulatory T cells are also indicated. Data shown as mean +/- SEM of biological replicates. n.s. not significant; \*\*\*p<0.001, unpaired t test with Holm-Sidak adjustment.

# Supplementary Figure 4

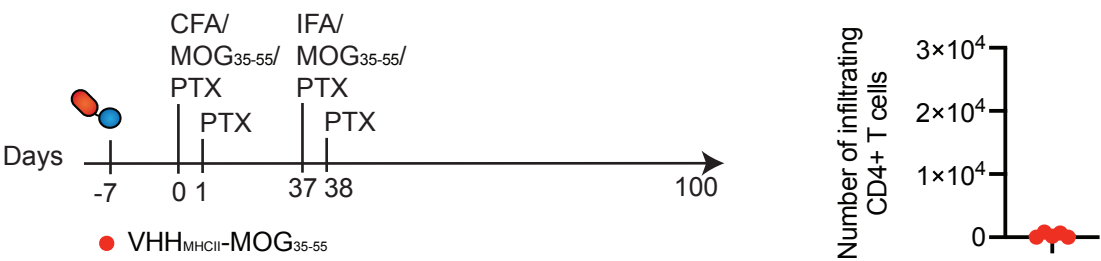

Flow cytometry analyses of infiltrating CD4+ lymphocytes in the spinal cord at the end point for mice that received 1 dose of VHH-antigen followed by exposure to to multiple EAE challenges. Data shown as mean +/- SEM of biological replicates.

## Supplementary Figure 5

**a**

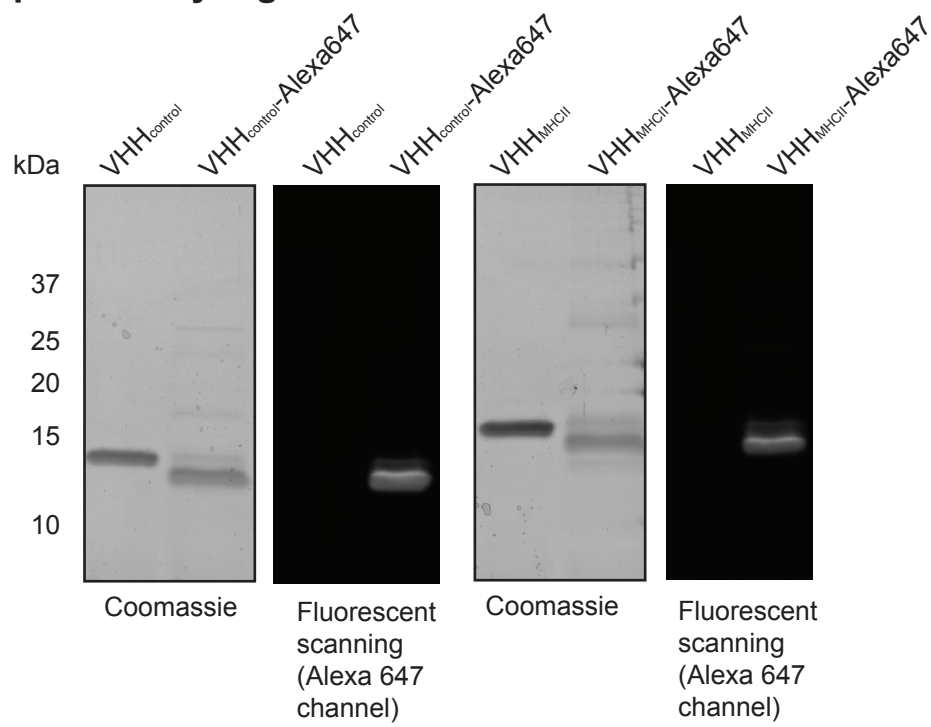

**b**

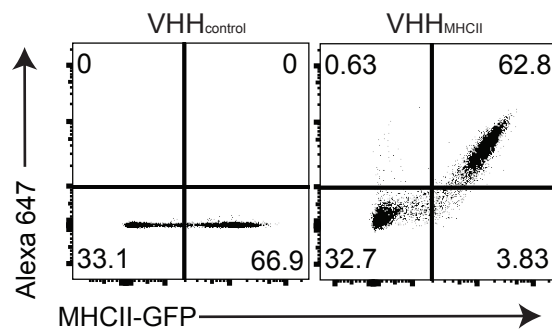

In vitro characterization of VHH-fluorophore, i.e. VHH<sub>MHCII</sub>-Alexa 647 and VHH<sub>control</sub>-Alexa 647. **a**, Coomassie and fluorescent western blots of unmodified and modified VHs carrying Alexa 647 generated by sortagging. **b**, Flow cytometry analyses of splenocytes from MHCII-GFP mouse indicate positive correlation of VHH<sub>MHCII</sub> binding and MHCII expression.

## Supplementary Figure 6

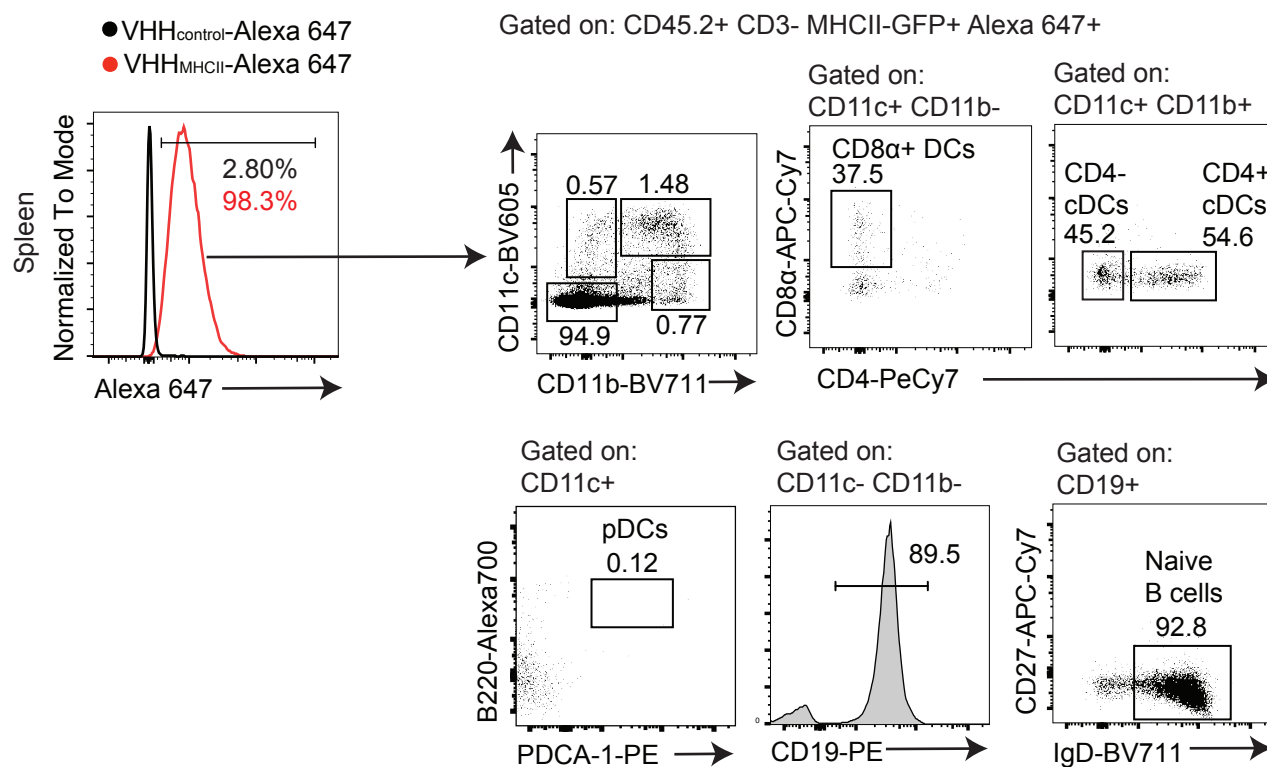

In vivo biodistribution of VHH<sub>MHCII</sub>. VHH<sub>MHCII</sub>-Alexa 647 was intravenously injected into MHCII-GFP mice. At 1.5 hours post injection, spleens, inguinal lymph nodes, and blood were collected and analyzed by flow cytometry. We also further dissected the subpopulation of splenic GFP+ Alexa 647+ APCs. cDCs (conventional DCs); pDCs (plasmacytoid DCs).

Supplementary Figure 7

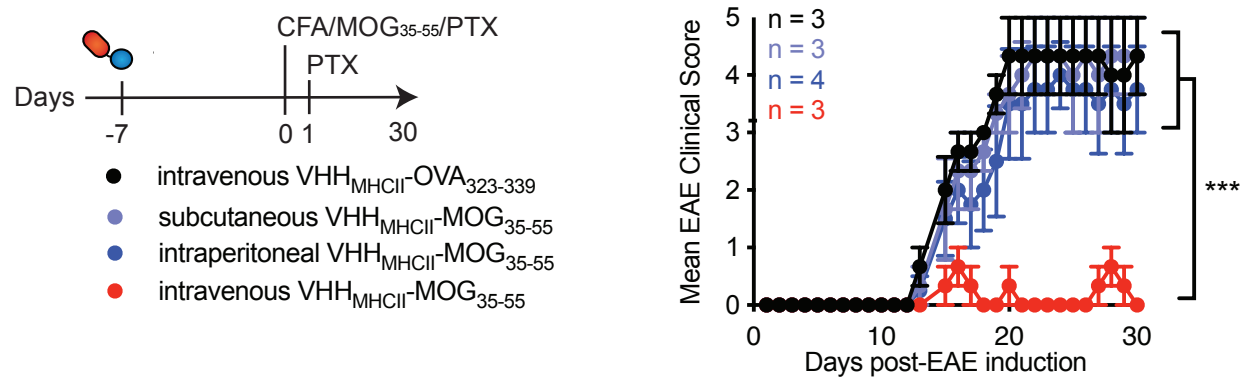

Determination whether the mode of delivery affects the VHH<sub>MHCII</sub>-MOG<sub>35-55</sub> mediated protection in EAE. Mean clinical scores of mice that received VHH-peptide prophylactic treatment injected intravenously, intraperitoneally, or subcutaneously. Clinical scores: 1, limp tail; 2, partial hind leg paralysis; 3, complete hind leg paralysis; 4, complete hind and partial front leg paralysis; and 5, moribund. \*\*\*, p<0.01, two-way analysis of variance (ANOVA) with repeated measures.

Supplementary Figure 8

a

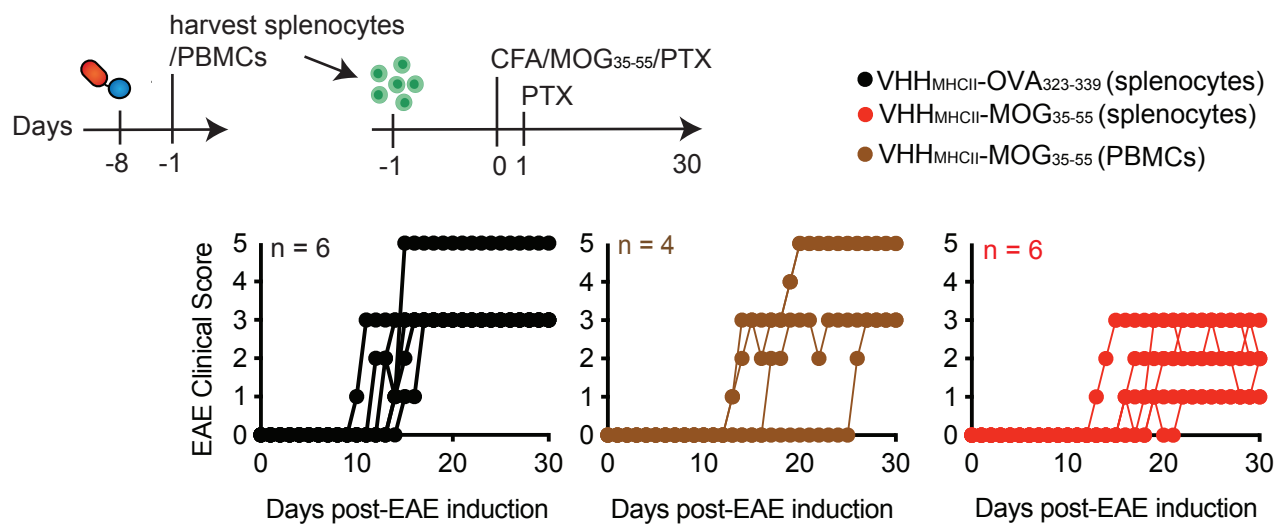

b

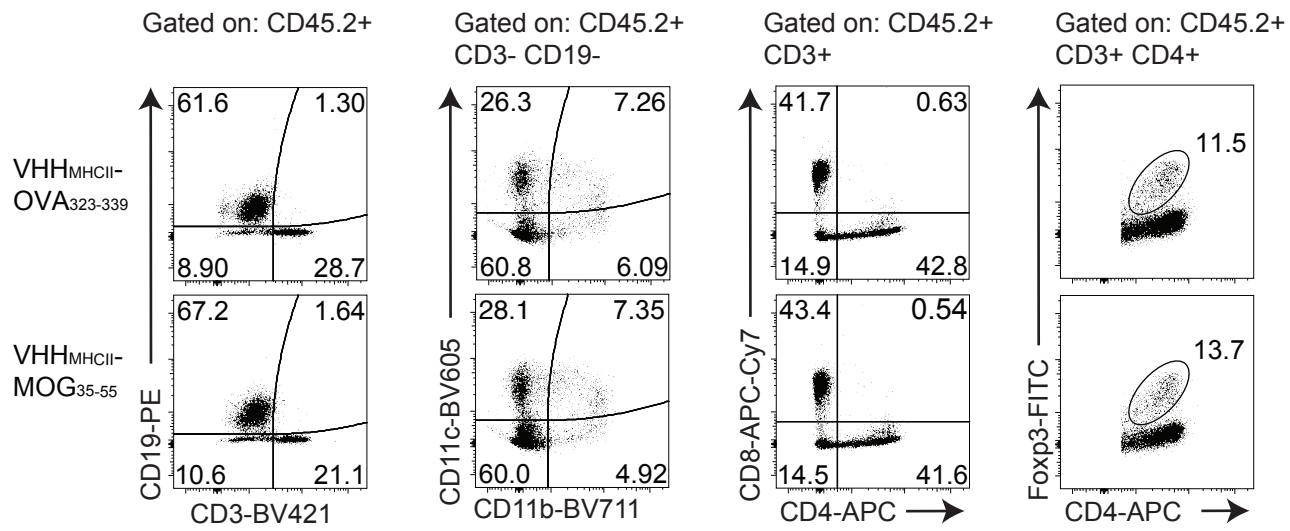

c

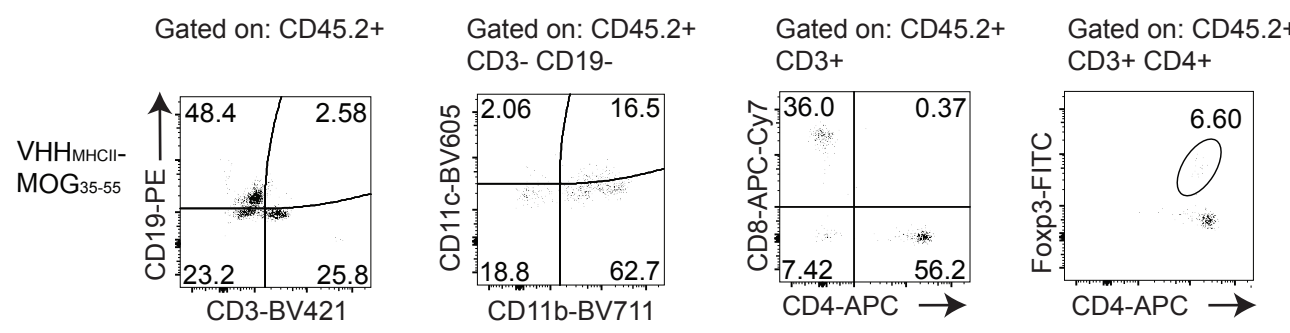

a, Individual clinical scores of mice that received splenocytes and peripheral blood mononuclear cells (PBMCs) from mice that have been treated with VHH<sub>MHCII</sub>-OVA<sub>323-339</sub> or with VHH<sub>MHCII</sub>-MOG<sub>35-55</sub>. Clinical scores: 1, limp tail; 2, partial hind leg paralysis; 3, complete hind leg paralysis; 4, complete hind and partial front leg paralysis; and 5, moribund. Composition of transferred splenocytes (b) and PBMCs (c) from experimental set up in (a).

## Supplementary Figure 9

**a**

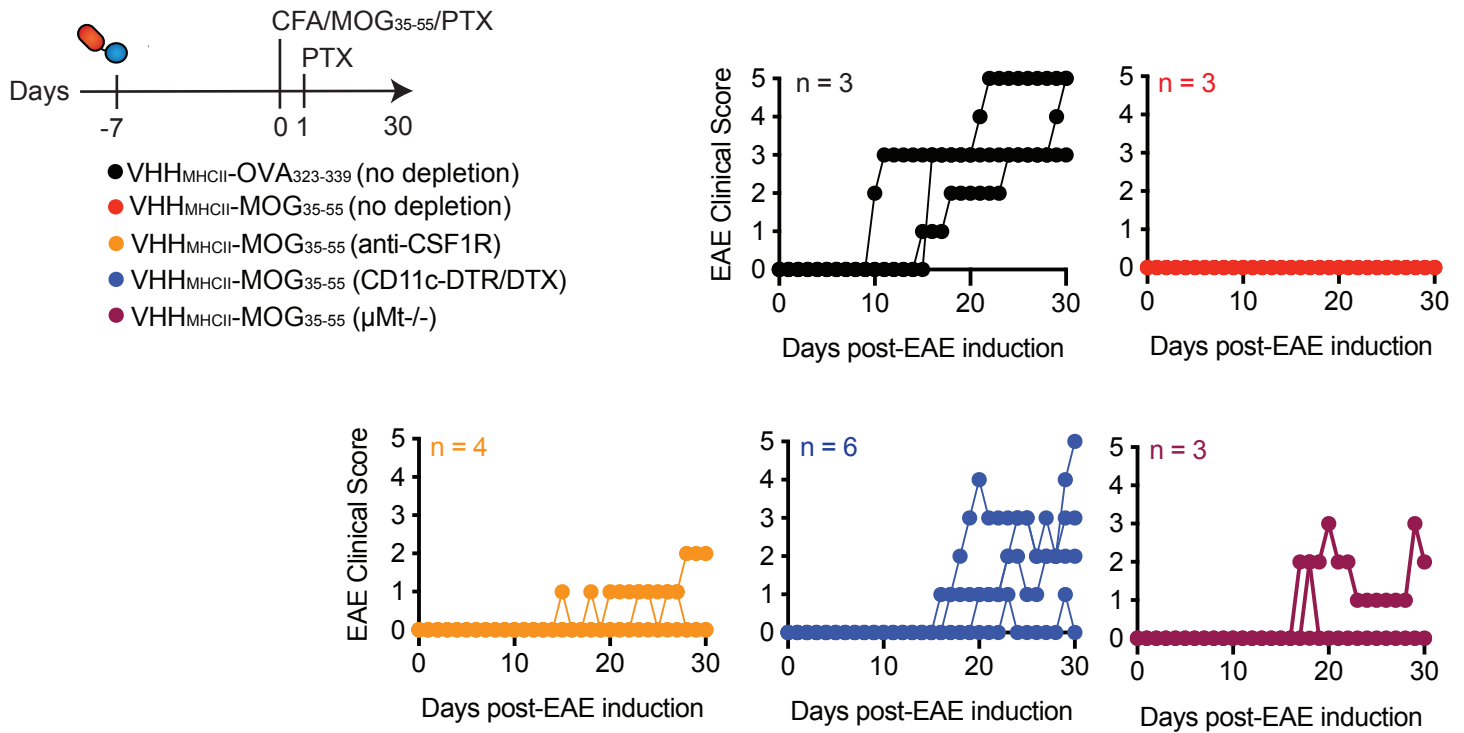

**b**

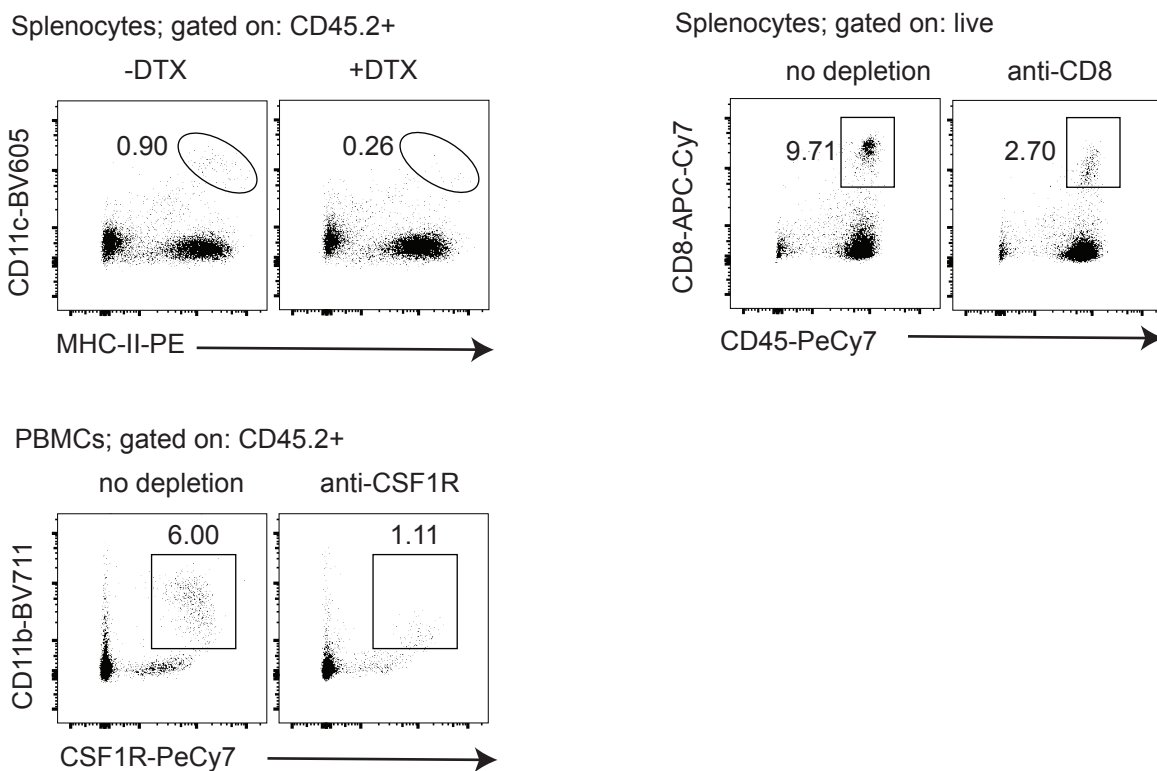

Depletion of selected cellular subsets to decipher cellular subsets that support VHH<sub>MHCII</sub>-mediated antigen-specific tolerance. **a**, Individual clinical scores of mice that received VHH<sub>MHCII</sub>-OVA<sub>323-339</sub> or with VHH<sub>MHCII</sub>-MOG<sub>35-55</sub> prophylactic treatment with the indicated cell subset depletion. To deplete CD8<sup>+</sup> T cells, mice were injected with 400μg intraperitoneally (i.p.) twice weekly beginning 2 weeks prior to VHH-antigen administration and throughout the EAE observation window. Macrophages were depleted by i.p. injection of 300μg of anti-CSF1R every other day beginning beginning 2 weeks prior to VHH-antigen administration and throughout the EAE observation window. Finally, to deplete DCs, we administered a single dose of 100ng DTX i.p. into CD11c-DTR mice 2 days prior to VHH-antigen administration. **b**, Flow cytometry confirmation of the depletions of CD8<sup>+</sup> T cells, macrophages and DCs a day prior to VHH-antigen administration.

Supplementary Figure 10

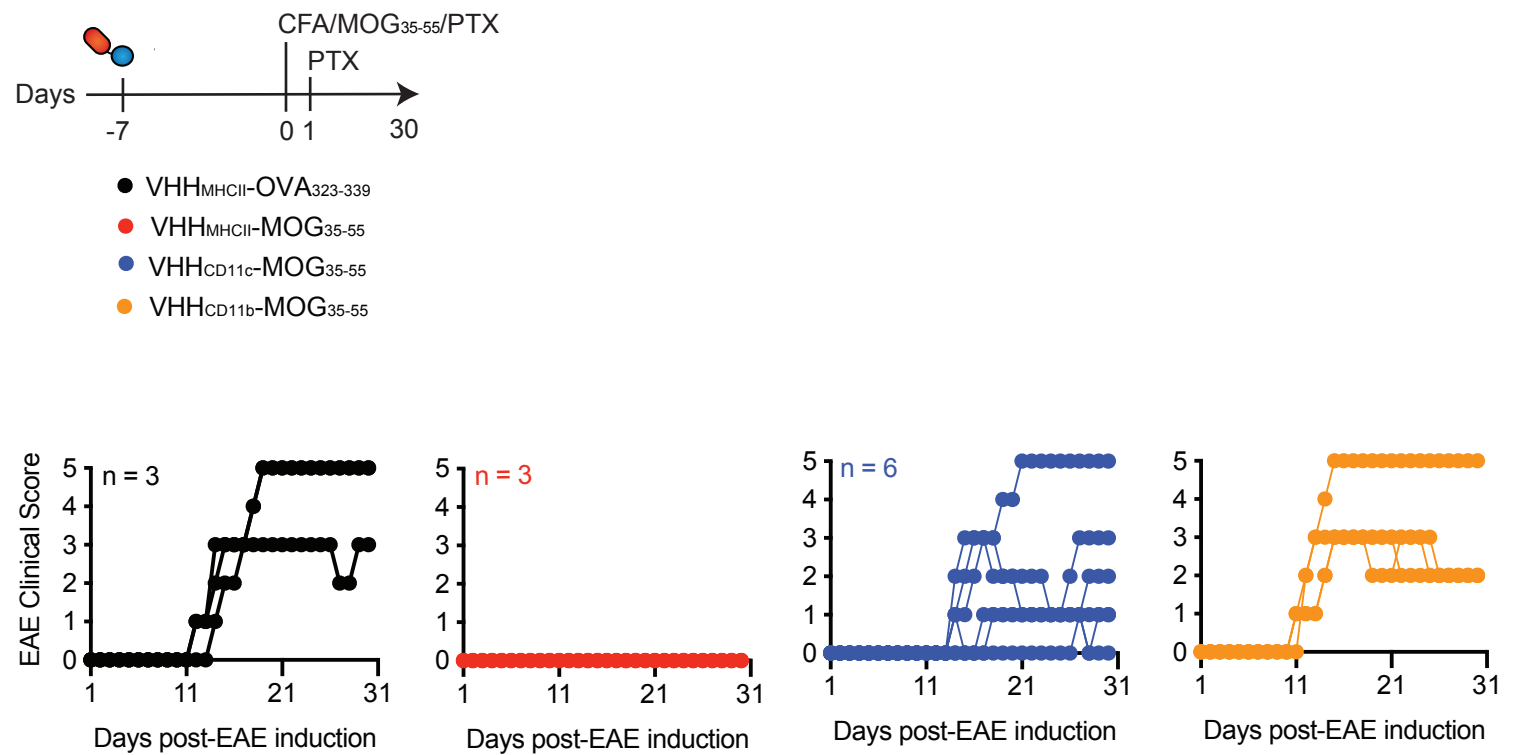

Individual clinical scores of mice that received the designated VHH-antigen. Clinical scores: 1, limp tail; 2, partial hind leg paralysis; 3, complete hind leg paralysis; 4, complete hind and partial front leg paralysis; and 5, moribund.

# Supplementary Figure 11

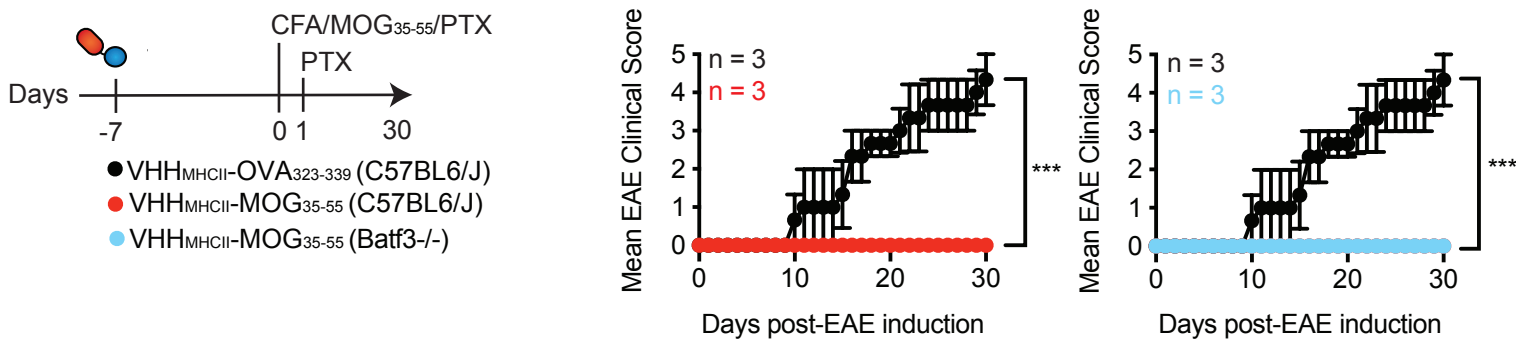

Mean clinical scores of wild type C57BL6/J or Batf3<sup>-/-</sup> mice (mice lacking CD8a<sup>+</sup> DCs) that received the designated VHH-antigen. Clinical scores: 1, limp tail; 2, partial hind leg paralysis; 3, complete hind leg paralysis; 4, complete hind and partial front leg paralysis; and 5, moribund. \*\*\*p<0.001, two-way analysis of variance (ANOVA) with repeated measures.

Supplementary Figure 12

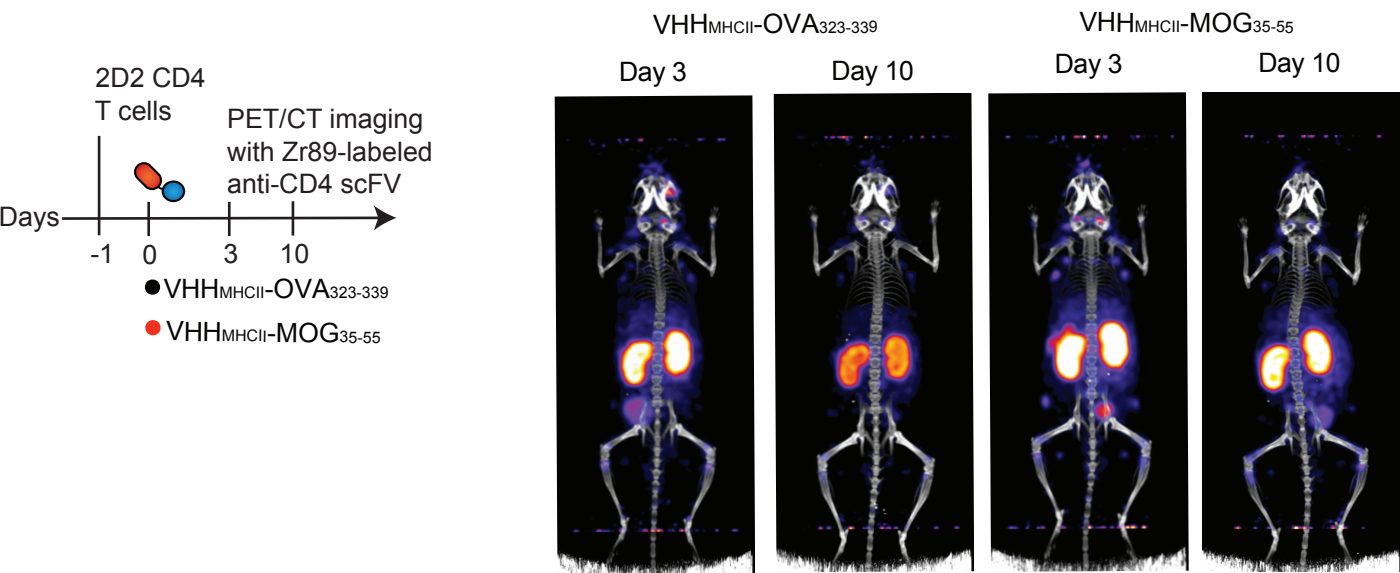

Non-invasive positron-emission tomography (PET)-CT imaging of adoptively transferred 2D2 CD4 T cells in Rag1<sup>-/-</sup> mice. In brief, 2D2 CD4 T cells were adoptively transferred into Rag1<sup>-/-</sup> mice and a day later, we administered VHH-antigen. At day 3 and 10, we injected <sup>89</sup>Zr-labeled PEGylated anti-CD4 scFV to track the in vivo distribution of the 2D2 CD4 T cells in the whole body of the recipient mice. This representative PET-CT images corroborate our findings in Fig. 3A.

Supplementary Figure 13

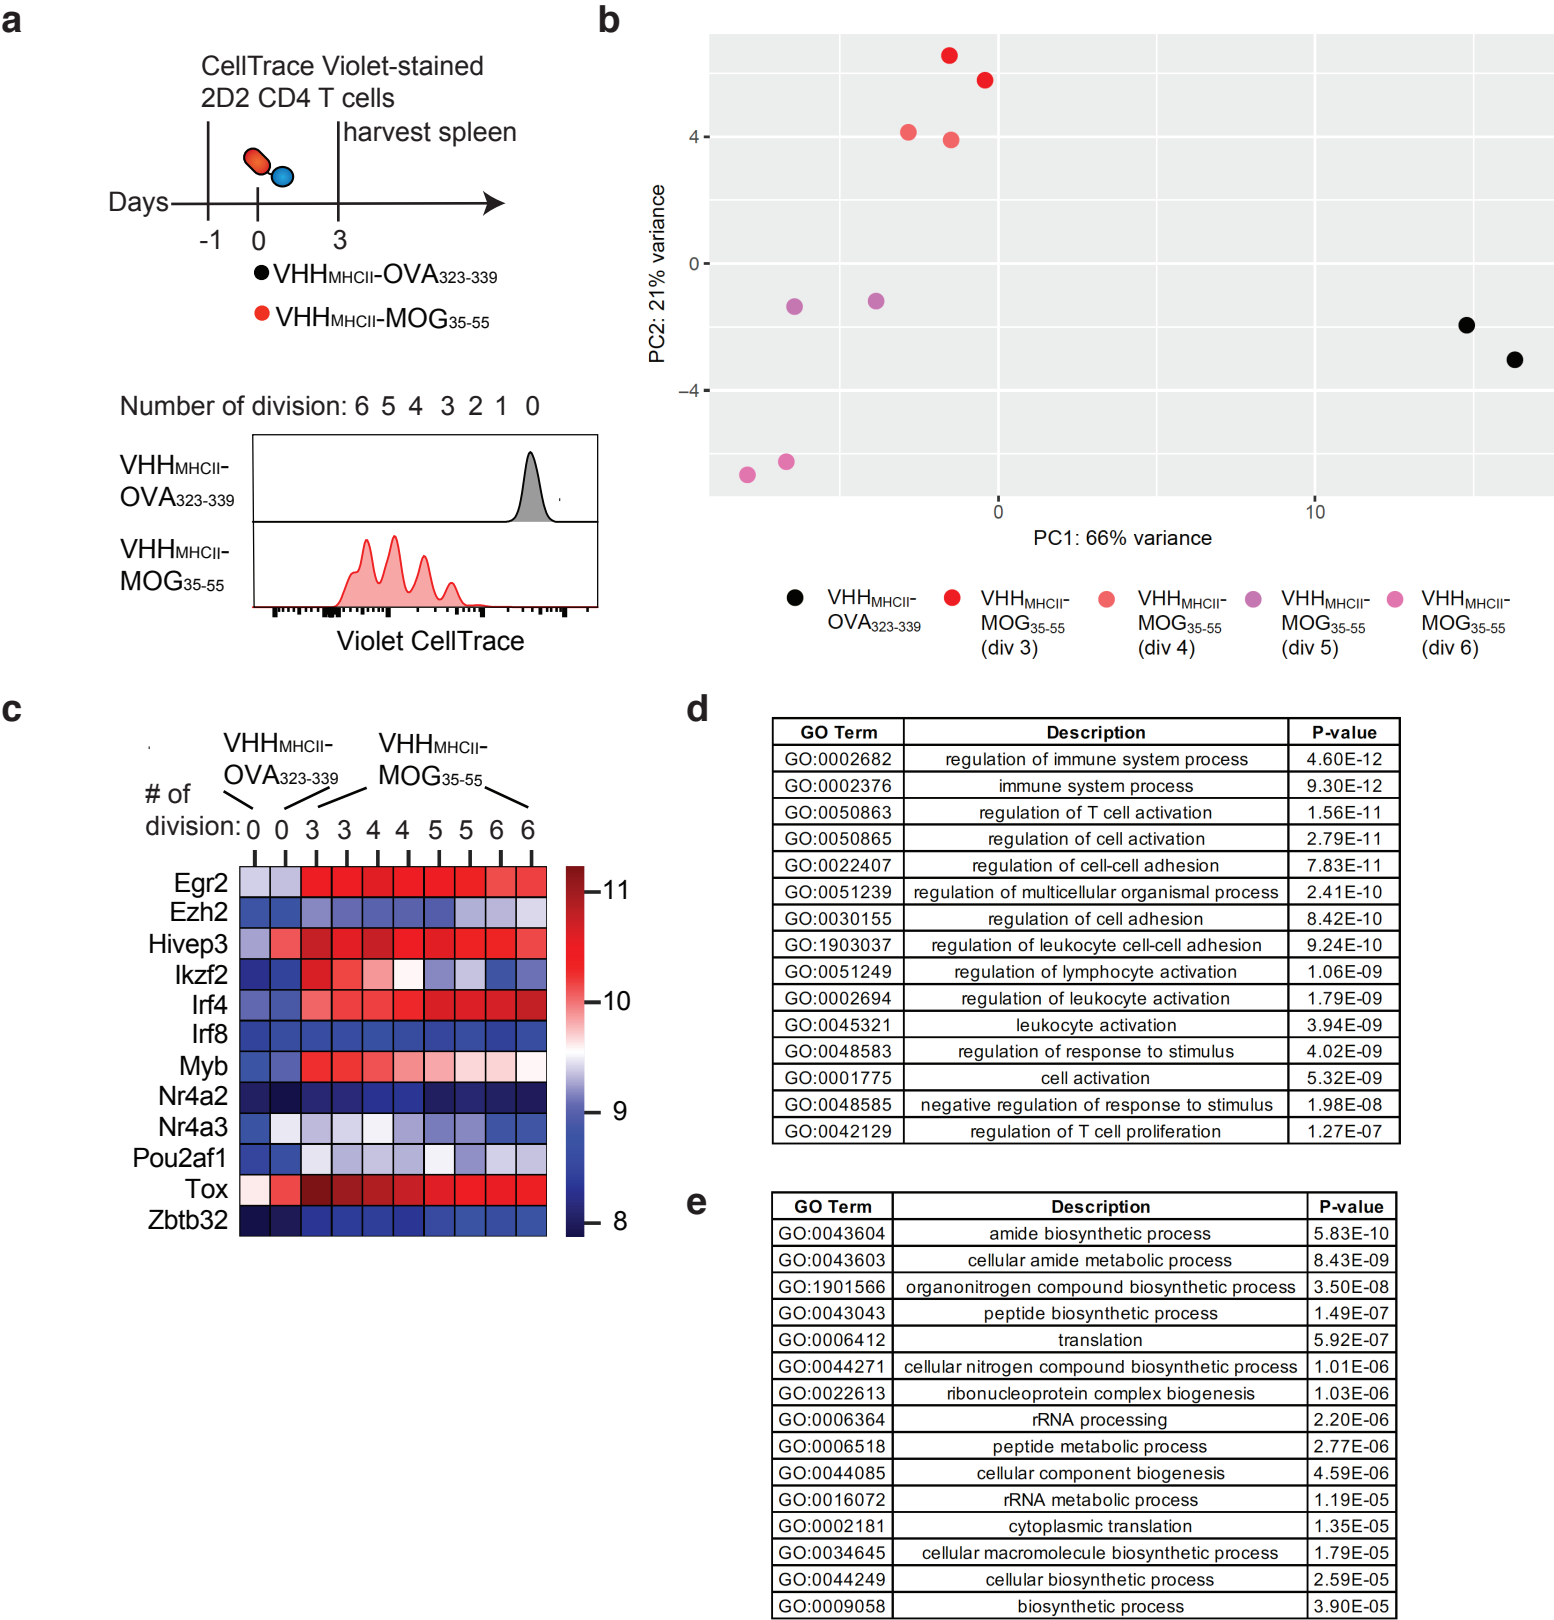

**a**, CellTrace Violet-labeled 2D2 CD4 T cells were adoptively transferred into congenically marked CD45.1 mice a day prior to infusion of VHH<sub>MHCII</sub>-OVA<sub>323-339</sub> or VHH<sub>MHCII</sub>-MOG<sub>35-55</sub>. At day 3 post infusion, spleens were collected and CD45.2<sup>+</sup> CD4<sup>+</sup> TCRα3.2<sup>+</sup> TCRβ11<sup>+</sup> cells were sorted and as indicated and processed for bulk transcriptomic analyses by RNAseq. **b**, Principal-components plots of RNA-seq data colored by FACS-sorted populations. Color code indicated below. **c**, Heatmap showing some transcriptional features of CD4<sup>+</sup> T cells. Gene ontology analyses of the top 500 genes that are upregulated (**d**) and downregulated (**e**) in 2D2 CD4 T cells in mice that received VHH<sub>MHCII</sub>-MOG<sub>35-55</sub> after 3 division (div 3) as compared to 2D2 CD4 T derived from mice that received VHH<sub>MHCII</sub>-OVA<sub>323-339</sub>.

## Supplementary Figure 14

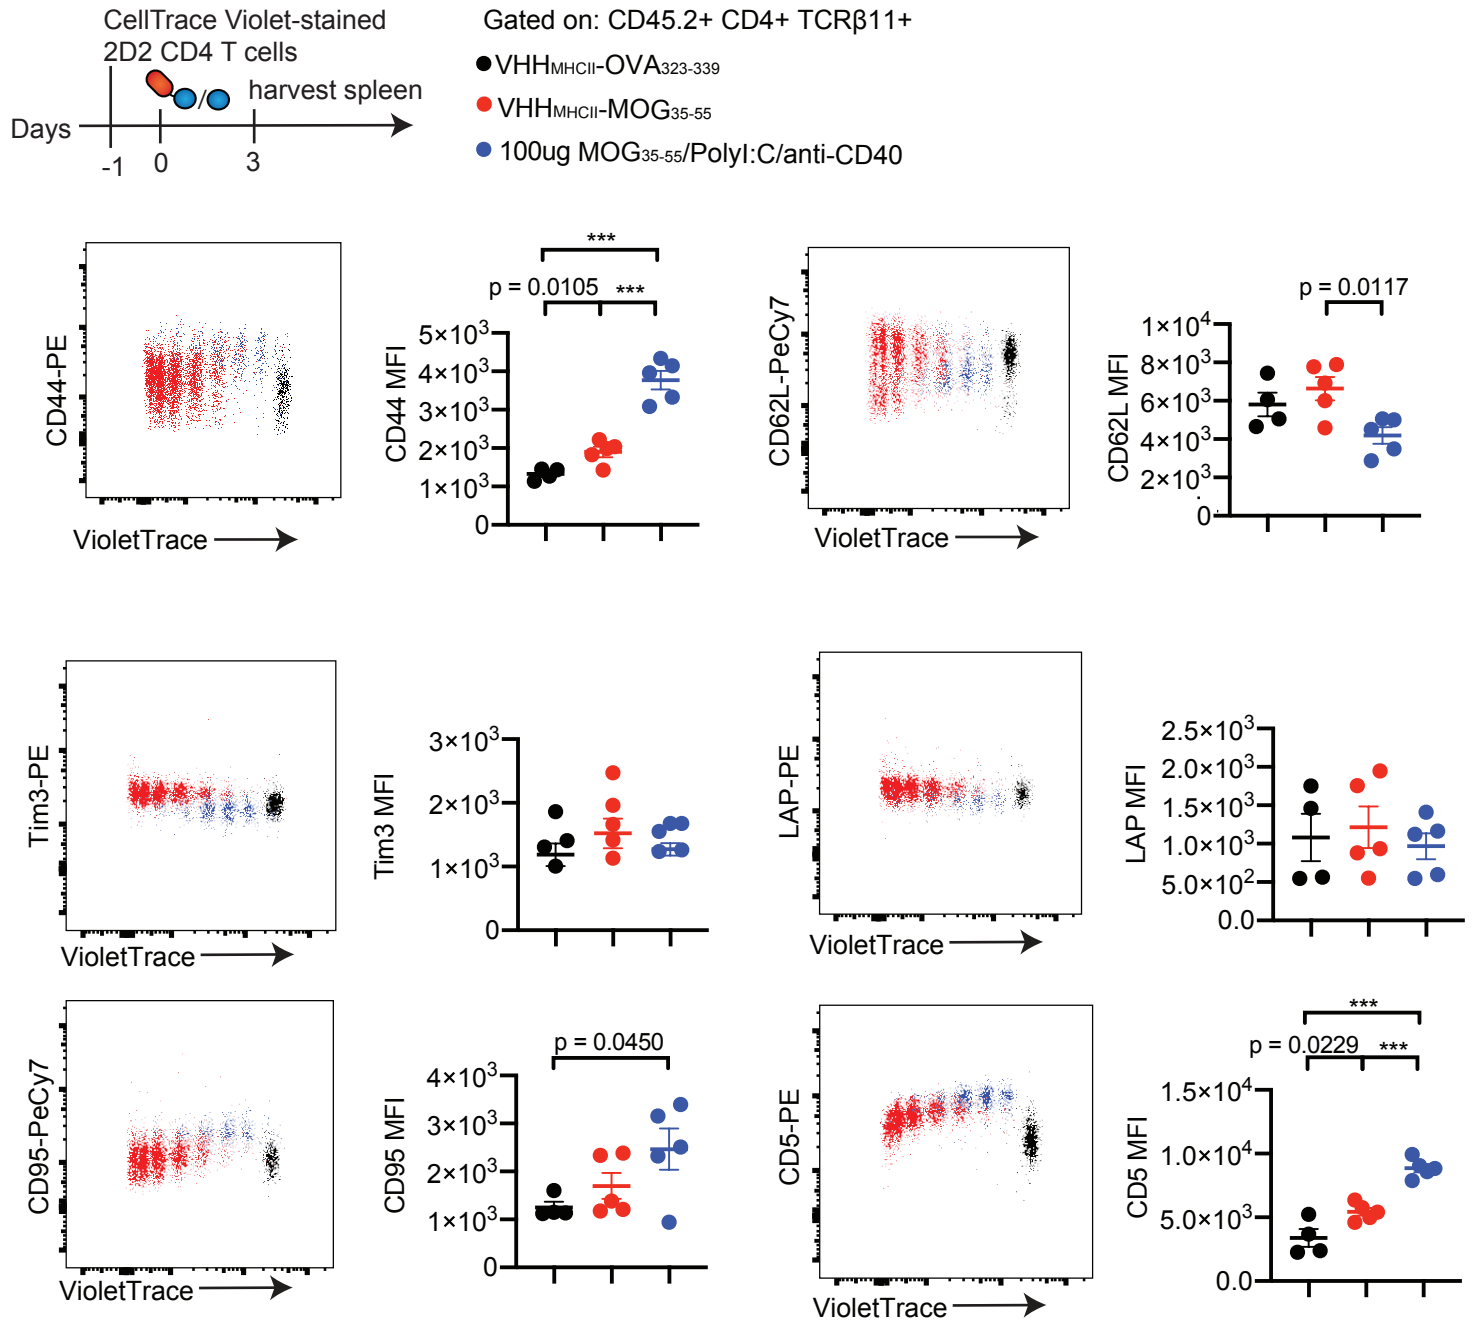

CellTrace Violet-labeled 2D2 CD4 T cells were adoptively transferred into congenically marked CD45.1 mice a day prior to infusion of VHH<sub>MHCII</sub>-MOG<sub>35-55</sub>, VHH<sub>MHCII</sub>-OVA<sub>323-339</sub>, or equimolar MOG<sub>35-55</sub> peptides in the presence of PolyI:C/anti-CD40 as adjuvant. At day 3 post infusion, spleens were collected and analyzed by flow cytometry. CellTrace Violet-dilution indicates the proliferation of 2D2 T cells at day 3. VHH<sub>MHCII</sub>-MOG<sub>35-55</sub> administration leads to a distinct pattern of phenotypic markers on 2D2 CD4 T cell. Representative flow images are shown and the mean fluorescent intensity (MFI) of each marker is plot as mean  $\pm$  SEM of biological replicates. \*\*\*p<0.001, unpaired t test with Holm-Sidak adjustment.

# Supplementary Figure 15

**a**

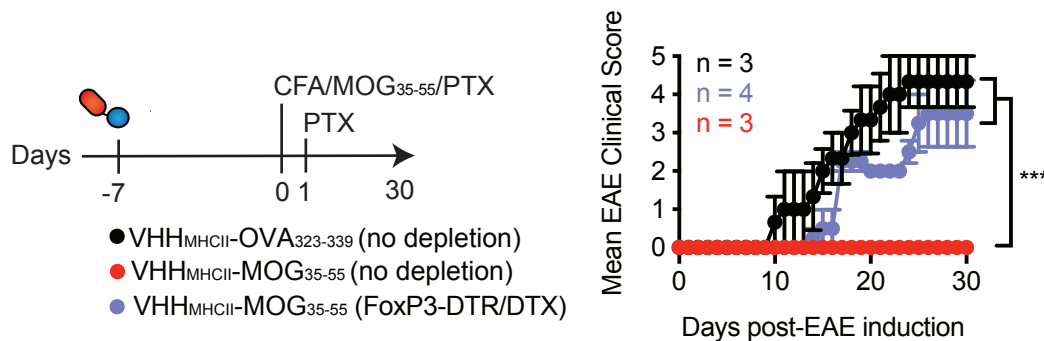

**b**

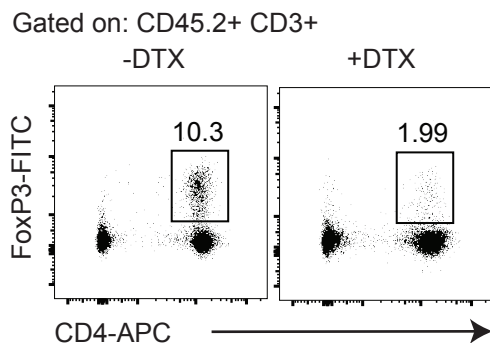

**c**

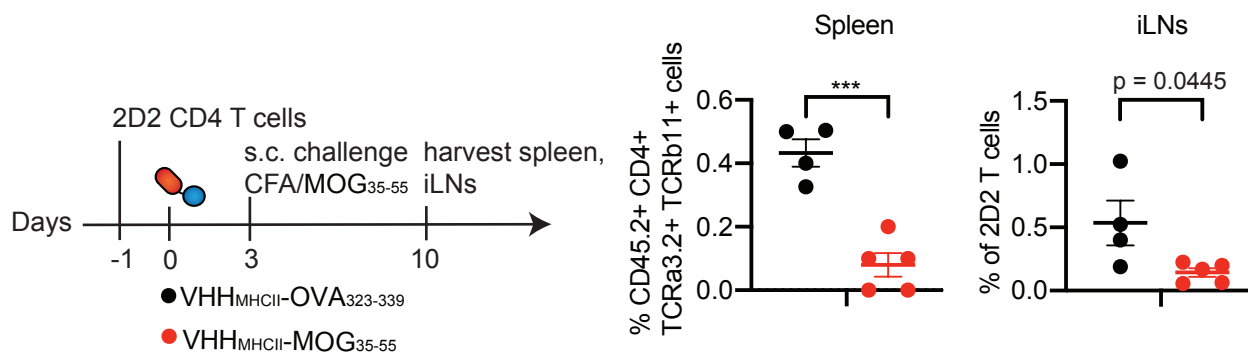

**d**

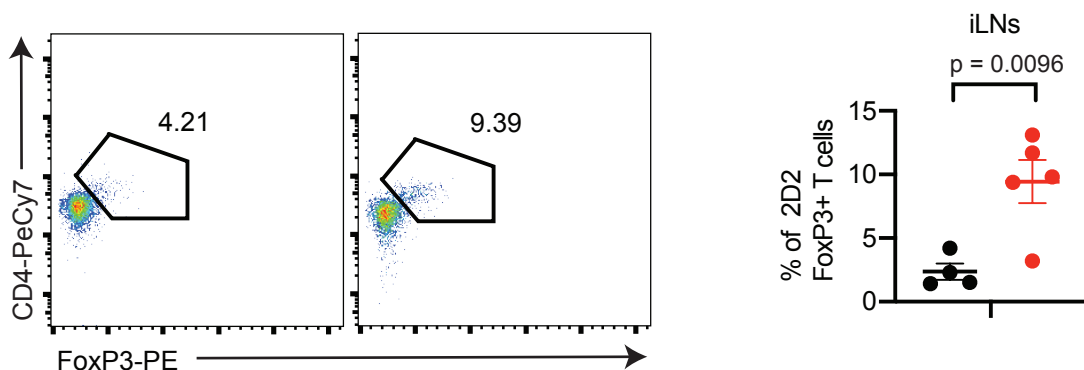

**a**, Mean clinical scores of mice that received VHH-peptide prophylactic treatment with or without depletion of regulatory T cells (Tregs). Tregs were depleted in FoxP3-DTR mice by injecting 3 doses of 1ug DTX i.p. at day -9, -8, -1 prior to therapy and weekly afterwards at 1ug i.p. until end point. Clinical scores: 1, limp tail; 2, partial hind leg paralysis; 3, complete hind leg paralysis; 4, complete hind and partial front leg paralysis; and 5, moribund. \*\*\*,  $p < 0.001$ , two-way analysis of variance (ANOVA) with repeated measures. **b**, Flow cytometry confirmation of the depletions of FoxP3+ Tregs cells, a day prior to VHH-antigen administration. **c**, 2D2 CD4 T cells were adoptively transferred into congenically marked CD45.1 mice a day prior to infusion of VHH-antigen. We further challenged these mice with MOG<sub>35-55</sub> emulsified in CFA at day 3. Spleens and iLNs were collected 7 days later. We found that 2D2 T cells in mice infused with VHH<sub>MHCII</sub>-MOG<sub>35-55</sub> failed to proliferate as effectively as 2D2 T cells in mice that received VHH<sub>MHCII</sub>-OVA<sub>323-339</sub>. Data are shown as mean  $\pm$  SEM of biological replicates. **d**, Yet, among the 2D2 T cells, we noticed an increase of FoxP3+ cells. Data are shown as mean  $\pm$  SEM of biological replicates. \*\*\* $p < 0.001$ , unpaired t test with Holm-Sidak adjustment.

Supplementary Figure 16

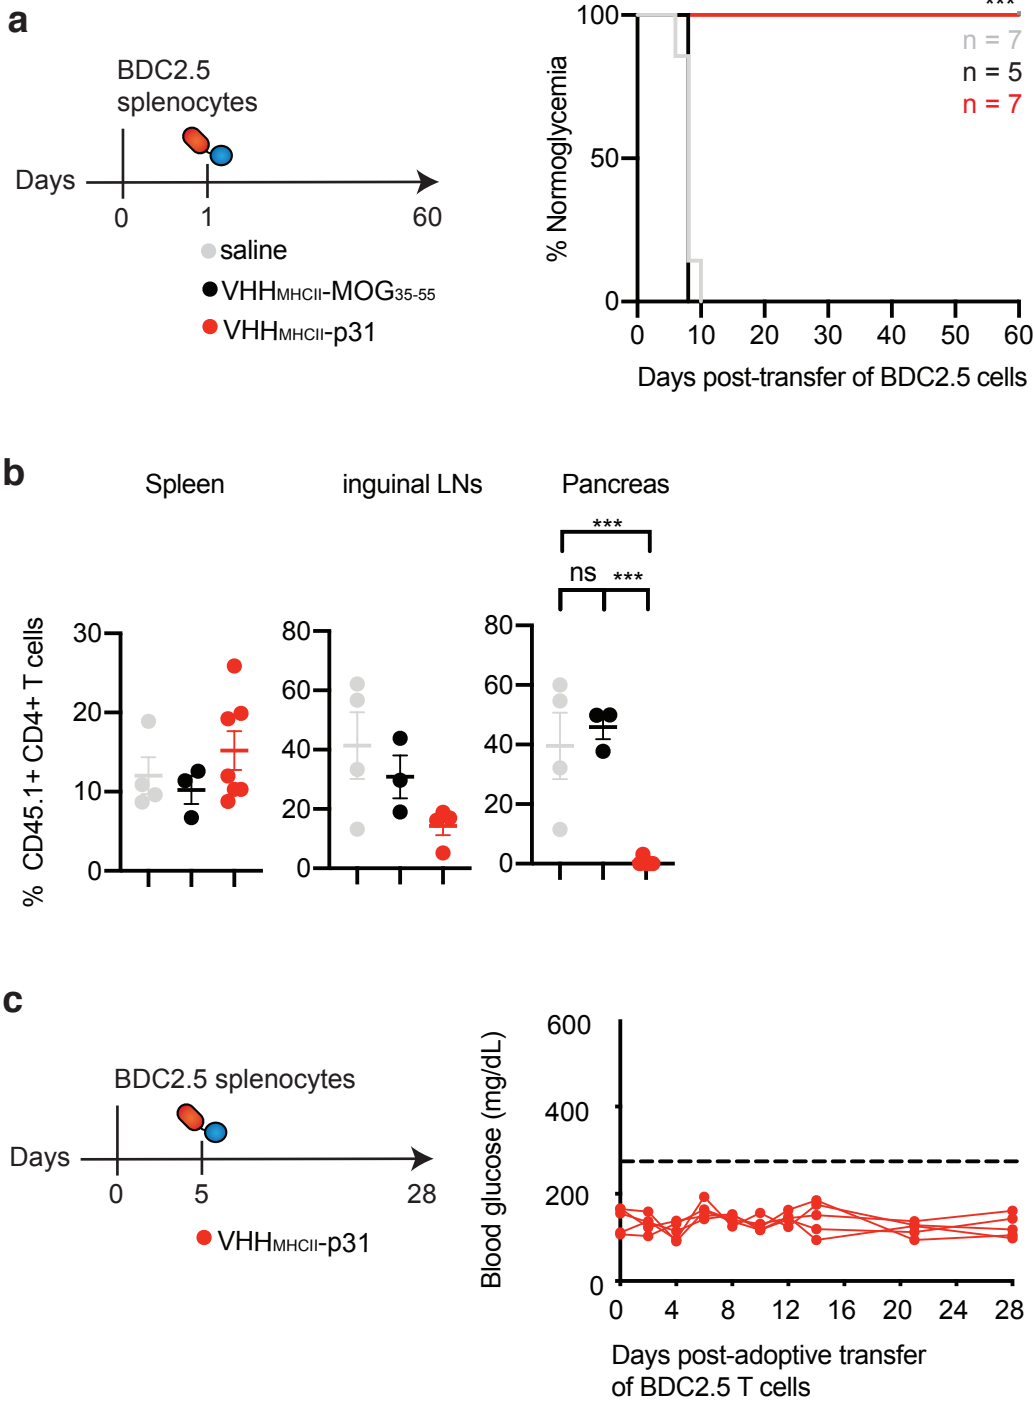

VHH<sub>MHCII</sub>-p31 could prevent T1D. **a**, Schematic for prophylactic T1D treatment at day 1 post-adoptive transfer of activated BDC2.5 splenocytes. Overall normoglycemic percentage of the data in Fig. 3c.  $p < 0.001$ , log-rank test. **b**, Flow cytometry analyses of infiltrating BDC2.5 CD4+ T cells in the designated organs 14 days after adoptive transfer of BDC2.5 splenocytes. Data shown as mean  $\pm$  SEM of biological replicates n.s. not significant; \*\*\* $p < 0.001$ , unpaired t test with Holm-Sidak adjustment. **c**, Schematic for semi-therapeutic T1D treatment at day 5 post-adoptive transfer of activated BDC2.5 splenocytes. Blood glucose levels were measured to monitor T1D progression. Mice were considered diabetic when glucose levels were  $>250$  mg/dL.

Supplementary Figure 17

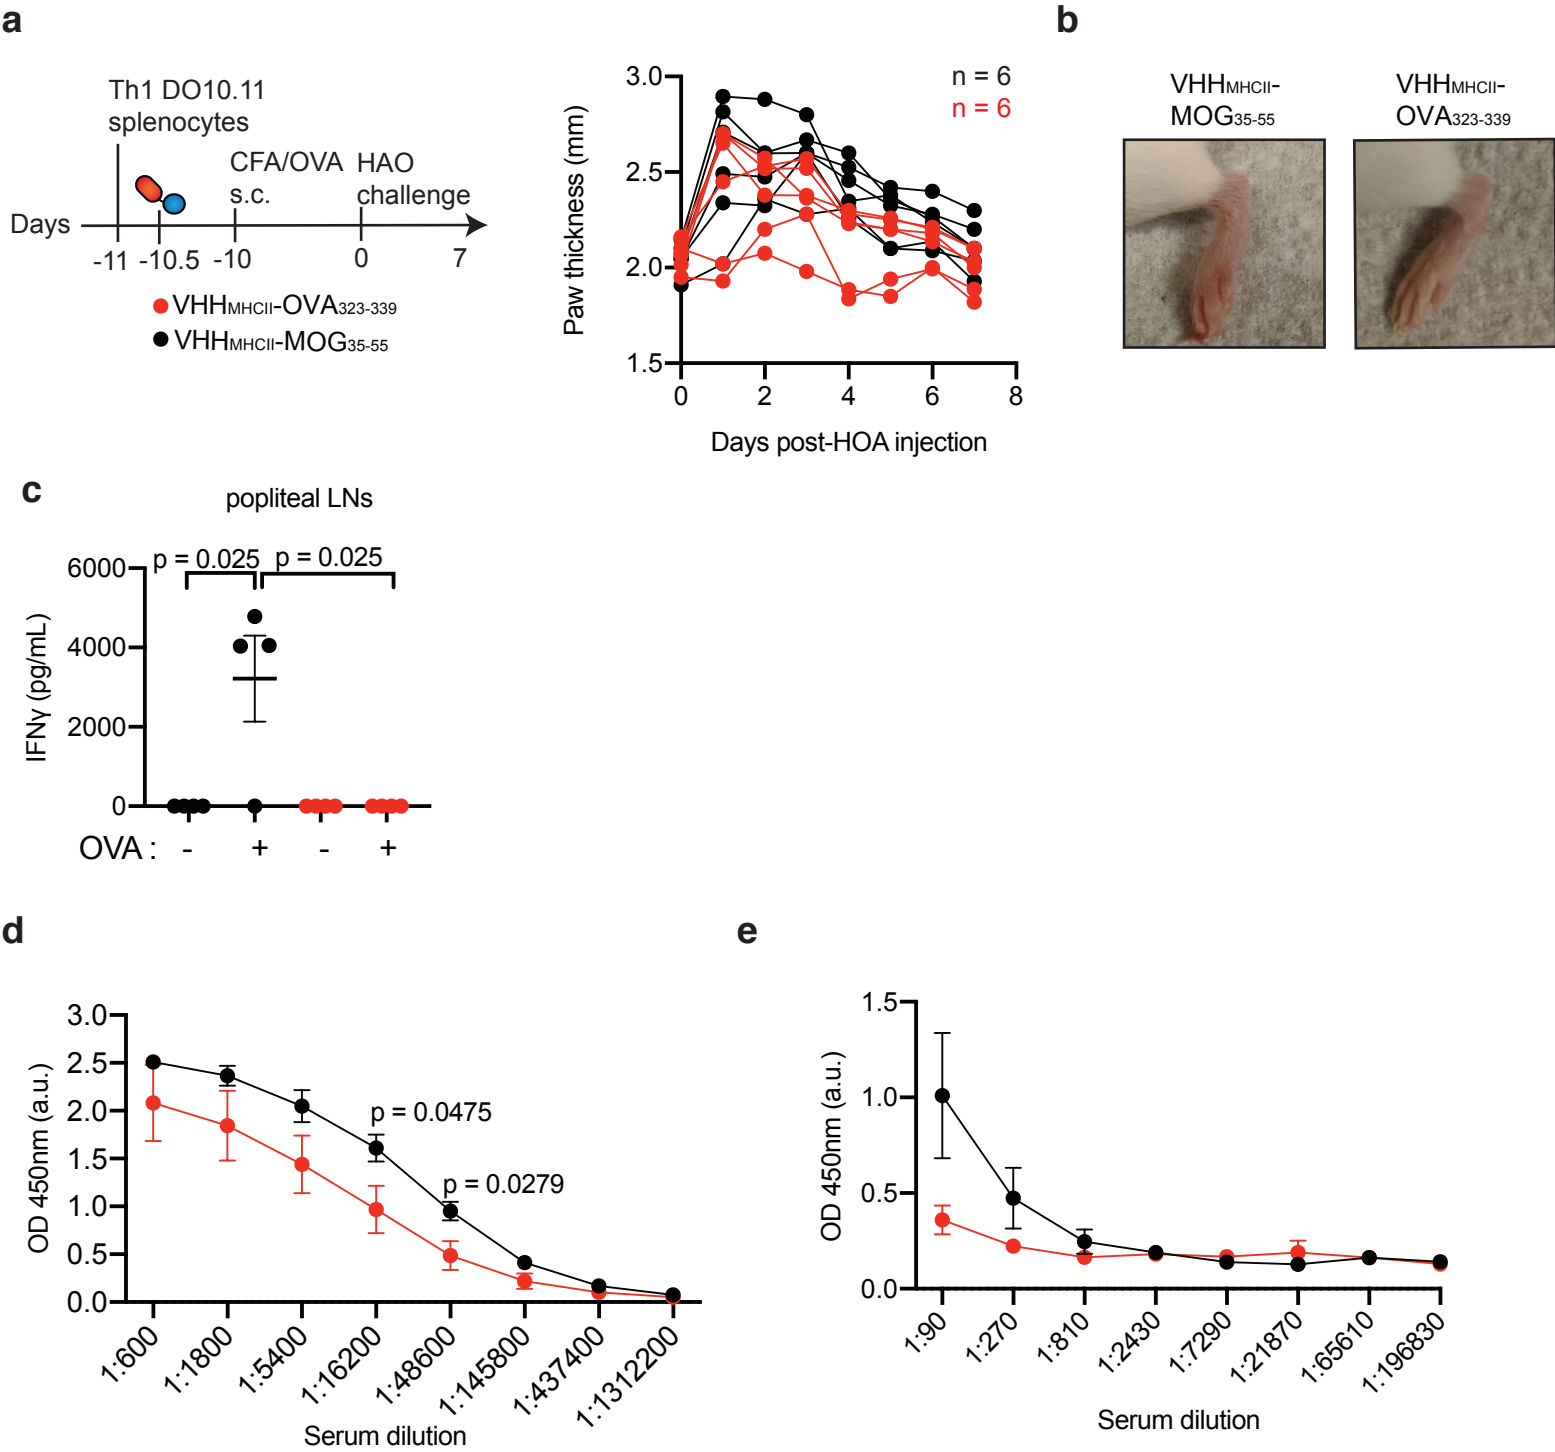

VHH<sub>MHCII</sub>-OVA<sub>323-339</sub> could reduce RA severity. **a**, Individual paw thickness of the mice treated with VHH-antigens to assess RA progression. **b**, Representative images of the mouse' paw at day 3 post heat-aggregated ovalbumin (HAO) challenge. **c**, Th1 responses of popliteal lymph nodes-derived splenocytes harvested at end point (day 7 post HAO challenges). Data shown as mean  $\pm$  SEM of biological replicates. p, unpaired t test with Holm-Sidak adjustment. Anti-Ovalbumin (**d**) and anti-OVA<sub>323-339</sub> (**e**) antibody responses from the mice described in (**a**). Data shown as mean  $\pm$  SEM of biological replicates. p, unpaired t test with Holm-Sidak adjustment.

Supplementary Figure 18

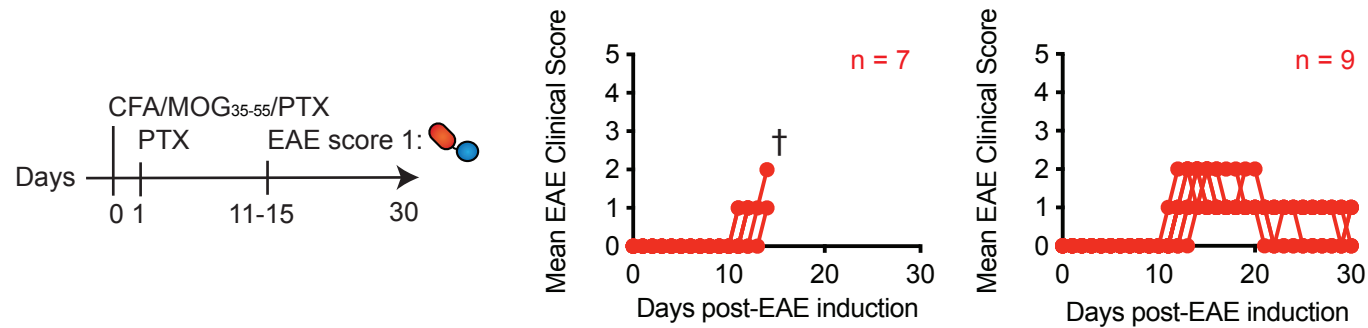

Individual clinical score of mice that were treated with a dose of received VHH<sub>MHCII</sub>-MOG<sub>35-55</sub> on the day the mouse reached clinical score of 1. Clinical scores: 1, limp tail; 2, partial hind leg paralysis; 3, complete hind leg paralysis; 4, complete hind and partial front leg paralysis; and 5, moribund. ~40% (7/16) of mice were found dead (†) attributed to cytokine storm.

## Supplementary Figure 19

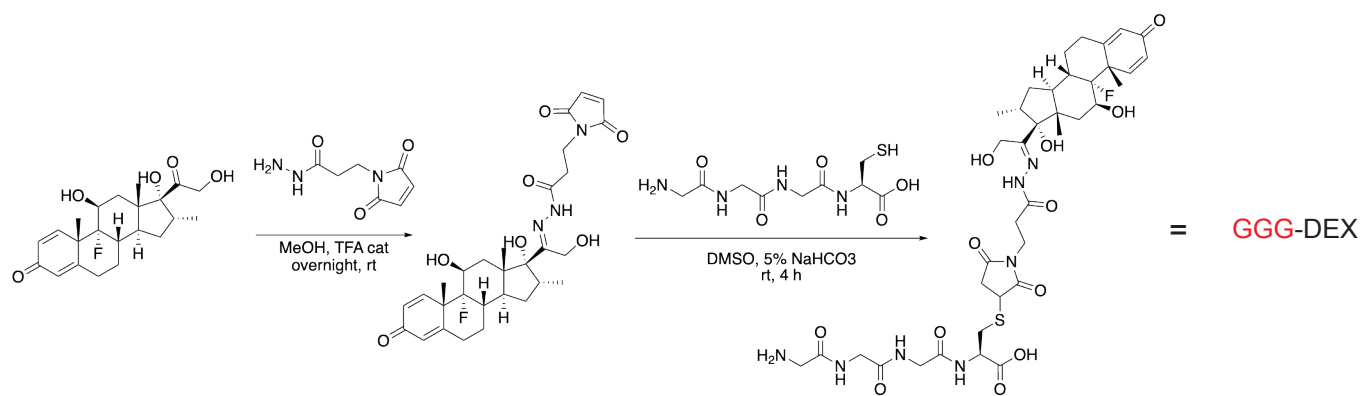

Schematic depicting the synthesis of GGG-carrying dexamethasone (DEX)

# Supplementary Figure 20

**a**

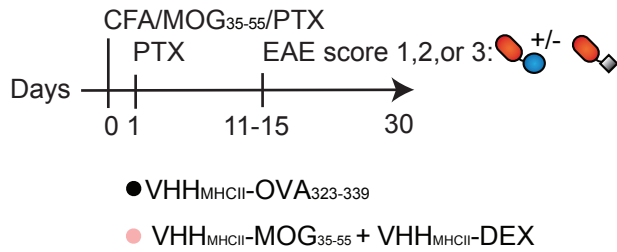

**b**

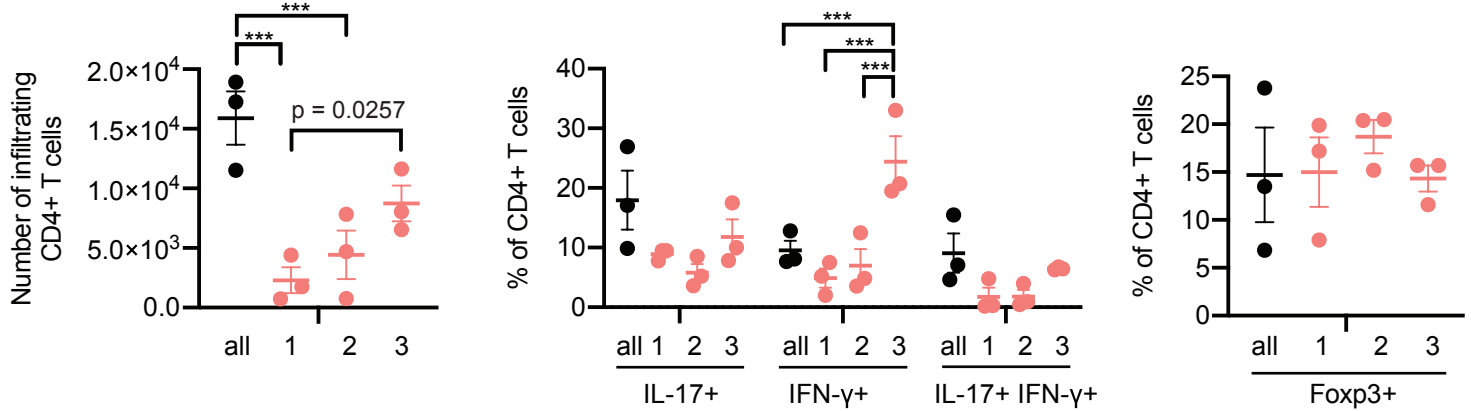

**a**, Experimental scheme. Clinical scores: 1, limp tail; 2, partial hind leg paralysis; 3, complete hind leg paralysis; 4, complete hind and partial front leg paralysis; and 5, moribund. **b**, Flow cytometry analyses of Th1 and Th17 infiltrating CD4<sup>+</sup> lymphocytes in the spinal cord at the end point for each mouse described in (a). Frequency of FoxP3<sup>+</sup> CD4<sup>+</sup> regulatory T cells are also indicated. Data shown as mean  $\pm$  SEM of biological replicates. \*\*\* $p$  < 0.001, unpaired t test with Holm-Sidak adjustment.

# Supplementary Figure 21

**a**

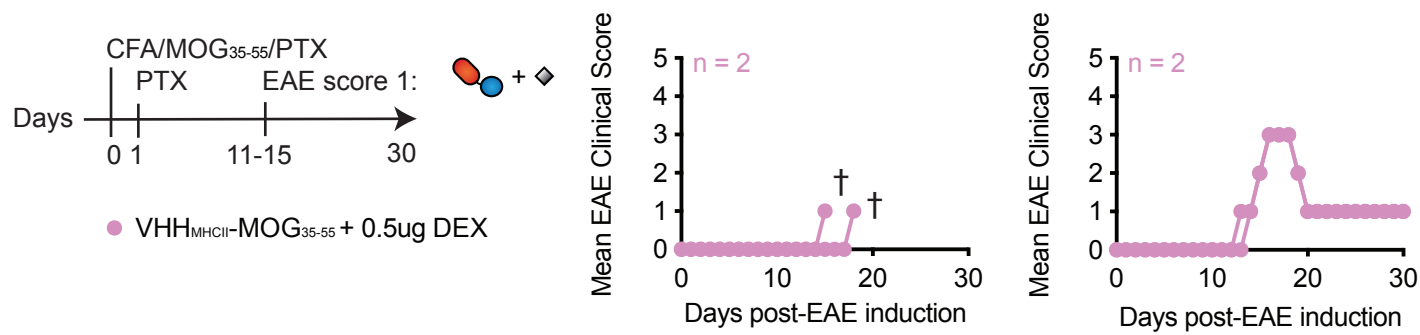

**b**

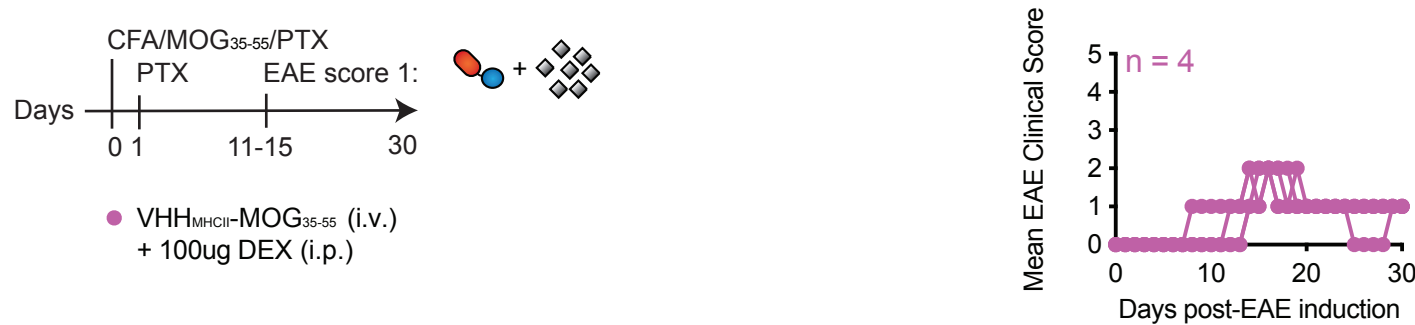

Individual clinical score of mice that were treated with a dose of received VHH<sub>MHCII</sub>-MOG<sub>35-55</sub> in the presence 0.5ug DEX (**a**) or 100ug DEX (**b**) on the day the mouse reached clinical score of 1. Clinical scores: 1, limp tail; 2, partial hind leg paralysis; 3, complete hind leg paralysis; 4, complete hind and partial front leg paralysis; and 5, moribund. 50% (2/4) of mice were found dead (†) when they received only 0.5ug DEX attributed to cytokine storm.
